# Supplementary material
Source: PubMed Central journal article supplement (PMC5815169)
Supplement: NIHMS937557-supplement-Supplementary_Tables.pdf [file NIHMS937557-supplement-Supplementary_Tables.pdf]

**e-Table 1:** Differences in demographic characteristics between obese asthmatic individuals with and without the highest levels (tertile) of insulin resistance.

| <b>Characteristic</b>      | <b>Highest level (tertile) of insulin resistance (n=308)</b> | <b>Lowest and middle levels (tertiles) of insulin resistance (n=148)</b> | <b>P value</b> |
|----------------------------|--------------------------------------------------------------|--------------------------------------------------------------------------|----------------|
| <b>Age (years)</b>         | 50 (34-67)                                                   | 47 (30-64)                                                               | 0.02           |
| <b>Sex</b>                 |                                                              |                                                                          |                |
| <b>Female</b>              | 57%                                                          | 78%                                                                      | <0.001         |
| <b>Race/ethnicity</b>      |                                                              |                                                                          |                |
| <b>Caucasian</b>           | 48%                                                          | 50%                                                                      | 0.71           |
| <b>Poverty index ratio</b> |                                                              |                                                                          |                |
| <b>≥1</b>                  | 74%                                                          | 77%                                                                      | 0.64           |
| <b>Smoking status</b>      |                                                              |                                                                          |                |
| <b>Never</b>               | 43%                                                          | 49%                                                                      | 0.11           |
| <b>Former</b>              | 30%                                                          | 19%                                                                      |                |
| <b>Current</b>             | 27%                                                          | 31%                                                                      |                |

**e-Table 2:** Demographic characteristics and outcomes in subsample tested for serum insulin and non-subsample participants.

| Characteristic                       | Data available on serum insulin levels |                | P value |
|--------------------------------------|----------------------------------------|----------------|---------|
|                                      | Yes<br>n=12,421                        | No<br>n=16,331 |         |
| <b>Age (years)</b>                   | 49 (48-49)                             | 49 (48-49)     | 0.45    |
| <b>Sex</b>                           |                                        |                |         |
| <b>Female</b>                        | 51%                                    | 52%            | 0.23    |
| <b>Race/ethnicity</b>                |                                        |                |         |
| <b>Caucasian</b>                     | 70%                                    | 66%            | <0.001  |
| <b>Body mass index</b>               |                                        |                |         |
| <25                                  | 32%                                    | 33%            | 0.61    |
| ≥25-29.9                             | 34%                                    | 33%            |         |
| ≥30                                  | 34%                                    | 34%            |         |
| <b>Poverty index ratio</b>           |                                        |                |         |
| ≥1                                   | 86%                                    | 88%            | 0.054   |
| <b>Physician-diagnosed asthma</b>    |                                        |                |         |
| Yes                                  | 14%                                    | 14%            | 0.90    |
| <b>Self-reported recent wheezing</b> |                                        |                |         |
| Yes                                  | 14%                                    | 14%            | 0.72    |
| <b>Smoking status</b>                |                                        |                |         |
| Never                                | 53%                                    | 53%            | 0.42    |
| Former                               | 25%                                    | 24%            |         |
| Current                              | 32%                                    | 2%             |         |
